# Supplementary material for: CD147 deficiency in T cells prevents thymic involution by inhibiting the EMT process in TECs in the presence of TGFβ
Source: PubMed Central journal article supplement (PMC7853129; doi:10.1038/s41423-019-0353-7), 2020-01-03
Supplement: 41423_2019_353_MOESM1_ESM.pdf [file 41423_2019_353_MOESM1_ESM.pdf]

## Supplementary Figure 1

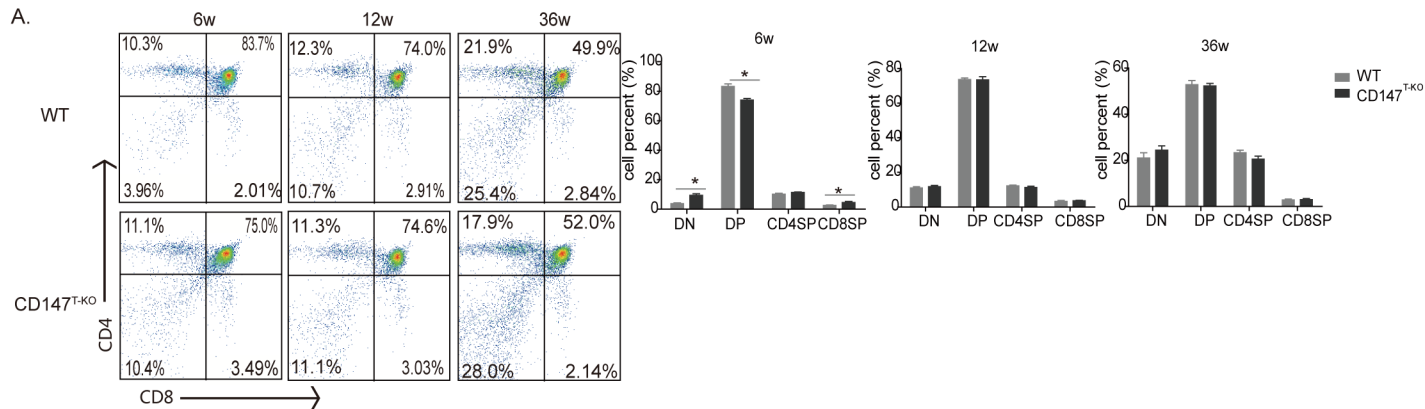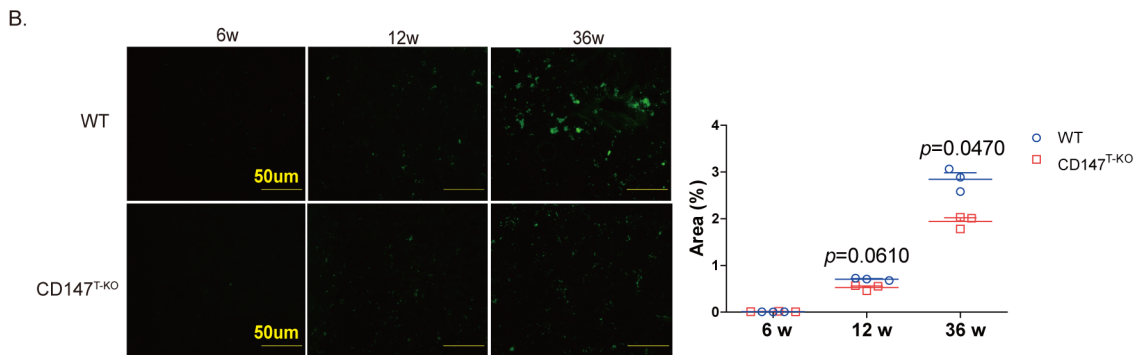

**Sup.Fig1.** A. Flow cytometry analysis of T cells subpopulations at 6, 12, and 36 weeks. B. LipidTox fluorescent staining showing lipid accumulation in the thymus of CD147<sup>T-KO</sup> mice and wild-type mice at 6, 12, and 36 weeks. The data are representative of 3 experiments.
