# Supplementary material for: CD147 deficiency in T cells prevents thymic involution by inhibiting the EMT process in TECs in the presence of TGFβ
Source: PubMed Central journal article supplement (PMC7853129; doi:10.1038/s41423-019-0353-7), 2020-01-03
Supplement: 41423_2019_353_MOESM3_ESM.pdf [file 41423_2019_353_MOESM3_ESM.pdf]

### Supplementary Figure3

A.

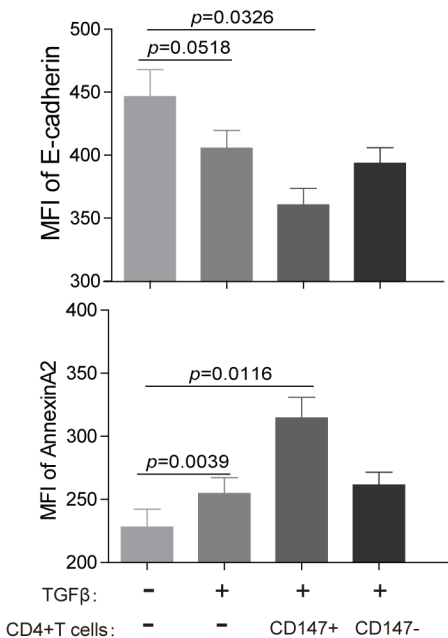

**Sup.Fig3. A.** The statistic analysis of E-cadherin and AnnexinA2.
